# Supplementary material
Source: PubMed Central journal article supplement (PMC6054500)
Supplement: DC171955SupplementaryData.pdf [file DC171955SupplementaryData.pdf]

SUPPLEMENTARY DATA

**Supplementary Table S1.** Characteristics of Medalist participants and non-participants in cognitive substudy

|                      | Completed cognitive assessment<br>n=82 | Did not complete cognitive assessment<br>n=934 |
|----------------------|----------------------------------------|------------------------------------------------|
|                      | %/Mean (SD)                            | %/Mean (SD)                                    |
| Sex (F)              | 54.9                                   | 54.4                                           |
| Age                  | 64.5 (6.8)                             | 65.9 (7.7)                                     |
| Age at Dx            | 11.5 (6.2)                             | 11.1 (6.4)                                     |
| Duration             | 53.0 (3.8)                             | 54.8 (5.8)                                     |
| A1c                  | 7.0 (0.8)                              | 7.2 (1.0)                                      |
| BMI                  | 26.2 (4.5)                             | 26.2 (4.7)                                     |
| Insulin dose per kg  | 0.4 (0.2)                              | 0.5 (0.2)                                      |
| Diastolic BP         | 65.3 (7.9)                             | 64.1 (8.6)                                     |
| Systolic BP          | 131.5 (18.4)                           | 132.3 (16.8)                                   |
| LDL                  | 81.5 (28.0)                            | 81.1 (24.2)                                    |
| HDL                  | 69.7 (19.3)                            | 65.0 (19.9)                                    |
| Total Cholesterol    | 165.5 (33.2)                           | 161.4 (33.2)                                   |
| Triglycerides        | 68.5 (27.6)                            | 75.3 (38.1)                                    |
| Waist circumference  | 91.4 (14.5)                            | 91.5 (15.6)                                    |
| Hip circumference    | 103.1 (11.5)                           | 101.5 (12.7)                                   |
| ACR                  | 41.6 (130.6)                           | 73.7 (370.4)                                   |
| CRP                  | 0.9 (3.3)                              | 1.8 (4.4)                                      |
| Calcium              | 9.1 (0.3)                              | 9.0 (0.4)                                      |
| eGFR                 | 75.6 (17.4)                            | 69.3 (20.5)                                    |
| Detectable c-peptide | 18.5                                   | 34.0                                           |
| DR3or4               | 92.3                                   | 93.5                                           |
| IA2+ or GAD65+       | 51.6                                   | 43.1                                           |
| CVD                  | 34.6                                   | 40.8                                           |
| PDR                  | 41.9                                   | 46.9                                           |
| DN                   | 3.7                                    | 13.5                                           |
| Neuropathy           | 63.2                                   | 70.6                                           |
| Hypertension         | 65.9                                   | 74.8                                           |
| Anti HTN meds        | 59.5                                   | 65.7                                           |
| Lipid lowering meds  | 67.9                                   | 69.7                                           |
| Smoker               | 41.5                                   | 48.2                                           |
| Exercise             | 84.2                                   | 78.9                                           |

## SUPPLEMENTARY DATA

**Supplementary Table S2.** Effect size estimate between control, type 1 and type 2 diabetes groups

| Cognitive Test                                                           | NDM vs. T1 | Type 2 vs. Type 1 |
|--------------------------------------------------------------------------|------------|-------------------|
| Grooved Pegboard (dominant hand) time (s)                                | -0.64      | 0.18              |
| Grooved Pegboard (non-dominant hand) time (s)                            | -0.65      | -0.17             |
| Letter-Number Sequencing (scaled)                                        | 0.34       | 0.04              |
| Immediate Memory (scaled)                                                | 0.98       | -0.01             |
| Delayed Memory (scaled)                                                  | 0.78       | 0.01              |
| Wechsler Abbreviated Scale of Intelligence FSIQ                          | -0.64      | 0.18              |
| Delis-Kaplan Executive Function System –Number-Letter Switching (scaled) | -0.65      | -0.17             |

**Supplementary Table S3.** Effect size estimate between Medalists with and without complications

| Cognitive Test                                                               | CVD<br>Yes vs No | PDR<br>Yes vs. No | Nephropathy<br>Yes vs. No | Neuropathy<br>Yes vs. No |
|------------------------------------------------------------------------------|------------------|-------------------|---------------------------|--------------------------|
| Grooved Pegboard (dominant hand) time (s)                                    | 0.21             | 0.58              | 0.65                      | 0.29                     |
| Grooved Pegboard (non-dominant hand) time (s)                                | 0.01             | 0.29              | 0.43                      | 0.43                     |
| Letter-Number Sequencing (scaled)                                            | -0.35            | 0.00              | -0.22                     | -0.19                    |
| Immediate Memory (scaled)                                                    | -0.24            | -0.01             | 0.09                      | -0.23                    |
| Delayed Memory (scaled)                                                      | -0.14            | 0.14              | -0.34                     | -0.03                    |
| Wechsler Abbreviated Scale of Intelligence FSIQ                              | -0.22            | -0.62             | -1.70                     | -0.39                    |
| Delis-Kaplan Executive Function System –<br>Number-Letter Switching (scaled) | -0.62            | -0.12             | -0.10                     | -0.13                    |
